# Supplementary material for: Hepcidin-induced reduction in iron content and PGC-1β expression negatively regulates osteoclast differentiation to play a protective role in postmenopausal osteoporosis
Source: publisher site journal article supplement (doi:10.18632/aging.202817), 2021-04-04
Supplement: Supplementary file [file aging-v13i8-202817-supplementary-material-SD1.pdf]

**SUPPLEMENTARY FIGURES**

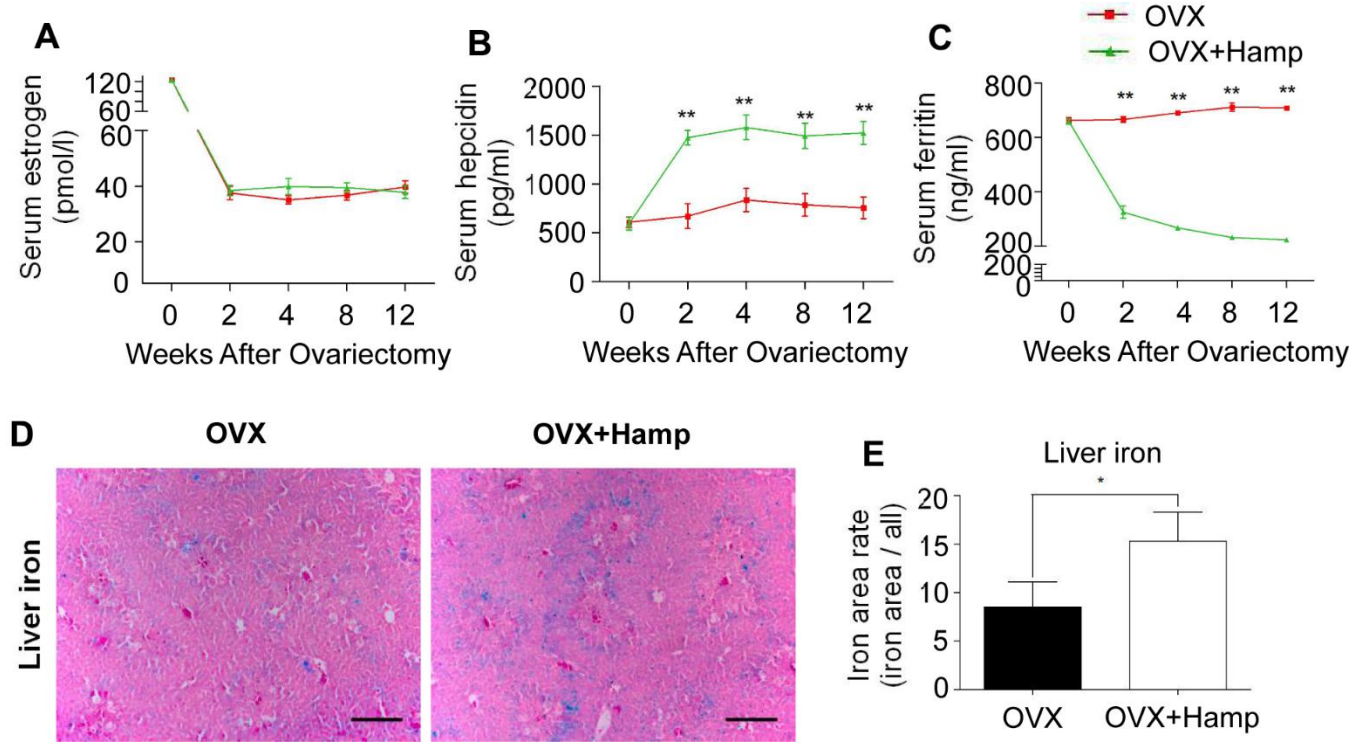

**Supplementary Figure 1. Hepcidin overexpression modulates the iron metabolism.** (A) Hepcidin overexpression has no effect on serum estrogen level; (B) Hepcidin overexpression increased the serum hepcidin level; (C) Hepcidin over-expression increased the serum ferritin level. Liver slices stained with prussian blue to evaluate iron deposit; (D) Hepcidin overexpression increase the irons contents in the mouse liver. (E) Quantitation of the mouse liver iron deposit from (D). Scale bar, 200  $\mu$ m. The asterisks (\*, \*\*) indicate significant differences at  $P < 0.05, 0.01$ .

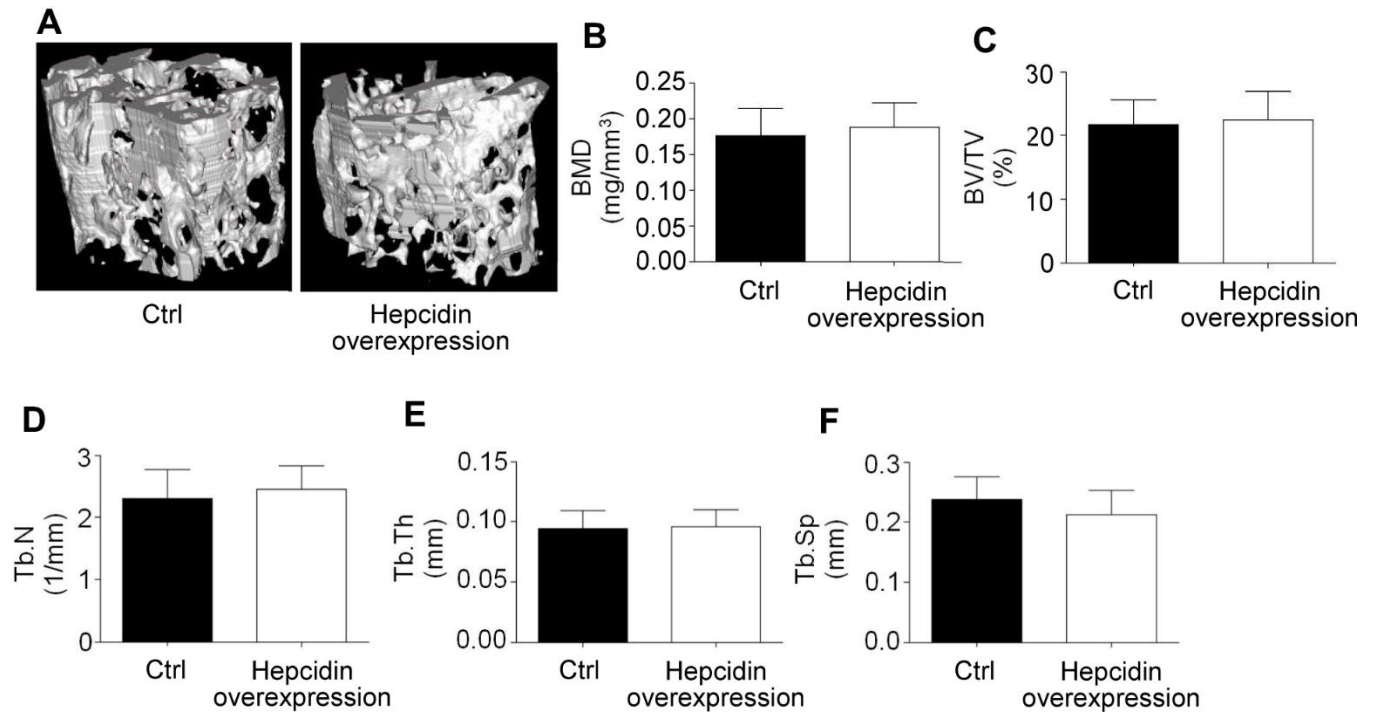

**Supplementary Figure 2. Hepcidin overexpression has no effect on non-ovariectomized mice bone.** (A) The micro-CT showed that there is no significant difference between the bone of the tamoxifen treated non-OVX mice; Micro-CT showed that (B) the distal femur bone mineral density, (C) the relevant parameters percent bone volume (BV/TV), (D) trabecular number (Tb.N), (E) trabecular thickness (Tb.Th) and (F) trabecular separation (Tb.Sp) are no difference between the bone parameters of the hepcidin overexpression non-OVX mice.

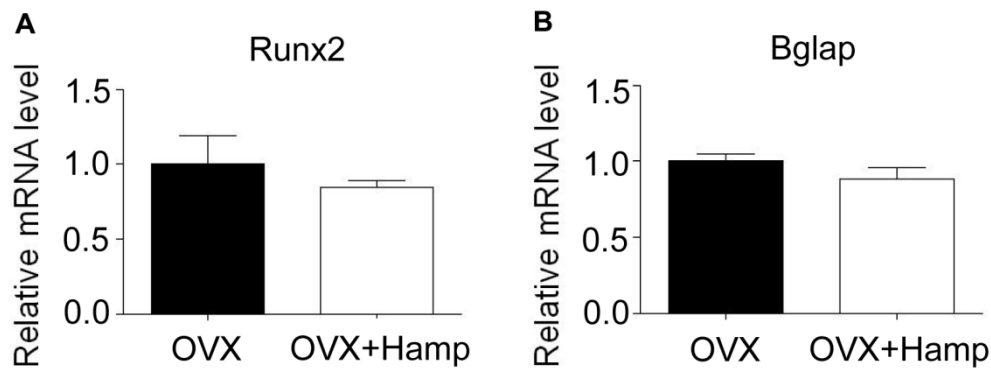

**Supplementary Figure 3. Hepcidin overexpression has no effect on osteoblast marker gene.** (A, B) Quantitative polymerase chain reaction (q-PCR) analysis of the expression of bone formation markers including (A) Runx2, (B) Bglap.
